# Supplementary material
Source: Elsevier journal article supplement (https://www.sciencedirect.com/science/article/pii/S1888989114000950)
Supplement: mmc1 [file S1888989114000950:mmc1.doc]

**Tabla complementaria 1** Genes candidatos seleccionados y SNP para el estudio farmacogenético

| ***Gen*** | **Descripción del gen** | | | **Posición del gen** | | **SNP** | | **MAF*** |
| --- | --- | --- | --- | --- | --- | --- | --- | --- |
| ***Sistema serotoninérgico*** |  | | |  | |  | |  |
| *HTR2A* | *Receptor de la serotonina 2A* | | | Chr13:q14-q21 | | rs6311 | | A:0.44 |
| *HTR2A* | *Receptor de la serotonina 2C* | | | ChrX:q24 | | rs3813929  rs518147  rs1414334 | | T:0.12  C:0.29  C:0.19 |
| *HTR1A* | *Receptor de la serotonina 1A* | | | Chr:5q11.2-q13 | | rs6295 | | C:0.48 |
| *SLC6A4* | *Transportador de la serotonina* | | | Chr:17q11.2 | | 5HTTLPR | | S=0.45 |
| ***Sistema Dopaminérgico*** |  | | |  | |  | |  |
| *DRD2* | *Receptor de la dopamina D2* | | | Chr:11q23 | | rs1800497  rs4436578  rs1079598  rs6277 | | A:0.29  C:0.35  G:0.21  G:0.27 |
| ***Sistema Histaminérgico*** |  | | |  | |  | |  |
| *HRH1* | *Receptor de la histamina H1* | | | Chr:3p25 | | rs238615  rs433303  rs164100  rs347587 | | G:0.38  T:0.27  T:0.27  G:0.43 |
| *AMPK* | *Proteína quinasa activada con 5’adenosina monofosfatasa* | | | Chr:5p12 | | rs1007499 | | A:0.37 |
| ***Sistema Adrenérgico*** |  | | |  | |  | |  |
| *ADRA2A* | *Subunidad receptora adrenergica alfa 2A* | | | Chr:10q25.2 | | rs553668  rs602618  rs1800544 | | A:0.29  C:0.49  G:0.48 |
|  |  | | |  | |  | |  |
|  | |  |  | |  | |  | |
|  | |  |  | |  | |  | |
|  | |  |  | |  | |  | |
|  | |  |  | |  | |  | |
|  | |  |  | |  | |  | |
|  | |  |  | |  | |  | |
|  | |  |  | |  | |  | |
|  | |  |  | |  | |  | |
|  | |  |  | |  | |  | |
|  | |  |  | |  | |  | |
|  | |  |  | |  | |  | |
|  | |  |  | |  | |  | |
|  | |  |  | |  | |  | |
|  | |  |  | |  | |  | |
|  | |  |  | |  | |  | |
|  | |  |  | |  | |  | |
|  | |  |  | |  | |  | |
|  | |  |  | |  | |  | |
|  | |  |  | |  | |  | |
|  | |  |  | |  | |  | |
|  | |  |  | |  | |  | |
|  | |  |  | |  | |  | |
|  | |  |  | |  | |  | |
|  | |  |  | |  | |  | |
|  | |  |  | |  | |  | |
|  | |  |  | |  | |  | |
|  | |  |  | |  | |  | |
|  | |  |  | |  | |  | |
|  | |  |  | |  | |  | |

| ***Cannabinoid system*** |  | | |  | |  | |  |
| --- | --- | --- | --- | --- | --- | --- | --- | --- |
| *CNR1* | *Receptores cannabinoides de tipo 1* | | | Chr : 6q14-q15 | | rs1049353 | | T:0.13 |
| ***Segundo mensajero*** |  | | |  | |  | |  |
| *GNB3* | *Subunidad beta 3 de la proteina G* | | | Chr:12p13 | | rs5443  rs5446 | | T:0.48  T:0.31 |
| ***Factores neurotróficos*** |  | | |  | |  | |  |
| *BNDF* | *Factor neurotrófico derivado del cerebro* | | | Chr:11p13 | | rs6265  rs1552736  rs11030096  rs11030076  rs7103411 | | T:0.23  A:0.42  C:0.32  G:0.38  C:0.26 |
| *NTRK2* | *Receptor tirosina quinasa neurotrófico tipo 2 (receptor BDNF)* | | | Chr:9q22.1 | | rs1619120  rs1778929  rs10465180  rs4388524 | | A:0.38  T:0.47  C:0.37  C:0.34 |
| ***Mecanismos relacionados con la regulación del peso*** |  | | |  | |  | |  |
| *LEP u Ob* | *Leptina* | | | Chr:7q31.3 | | rs7799039  rs2167270  rs12706832  rs10244329 | | A:0.43  A:0.35  A:0.49  T:0.45 |
| *LEPR* | *Receptor de la leptina 1* | | | Chr:1p31 | | rs1137101  rs8179183 | | G:0.41  C:0.14 |
| *NPY* | *Neuropéptido Y* | | | Chr:7p15.1 | | rs16141  rs5574 | | G:0.45  T:0.41 |
| *ADIPOQ* | *Adiponectina* | | | Chr:3q27 | | rs2241766  rs822393 | | G:0.14  T:0.36 |
| *ADIPOR1* | *Receptor adiponectina 1* | | | Chr:1q32.1 | | rs1342387  rs12733285 | | T:0.46  T:0.21 |
|  |  | | |  | |  | |  |
|  | |  |  | |  | |  | |
|  | |  |  | |  | |  | |
|  | |  |  | |  | |  | |
|  | |  |  | |  | |  | |
|  | |  |  | |  | |  | |
|  | |  |  | |  | |  | |
|  | |  |  | |  | |  | |
|  | |  |  | |  | |  | |
|  | |  |  | |  | |  | |
|  | |  |  | |  | |  | |
|  | |  |  | |  | |  | |
|  | |  |  | |  | |  | |
|  | |  |  | |  | |  | |
|  | |  |  | |  | |  | |
|  | |  |  | |  | |  | |
|  | |  |  | |  | |  | |

|  |  | | |  | | rs1539355 | | G:0.29 |
| --- | --- | --- | --- | --- | --- | --- | --- | --- |
| *ADIPOR2* | *Receptor adiponectina 1* | | | Chr:12p13.31 | | rs11061925  rs11612383  rs11061974  rs1044471 | | T:0.31  A:0.39  A:0.37  T:0.37 |
| *SNAP25* | *Proteína Asociada a Sinaptosomas, 25kDa* | | | Chr:20p12-p11.2 | | rs1051312  rs3746544  rs8636 | | C:0.14  G:0.29  T:0.27 |
| *INSIG1* | *Insulina inducida por gen-1* | | | Chr:7q36 | | rs13223383  rs9769826  rs9769506 | | G:0.38  A:0.49  C:0.40 |
| *INSIG2* | *Insulina inducida por gen-2* | | | Chr:2q14.2 | | rs17047764  rs889904  rs2161829  rs889904 | | C:0.19  T:0.41  G:0.48  T:0.41 |
| ***Candidatos de estudios GWAS de obesidad e IMC*** |  | | |  | |  | |  |
| *FTO* | *Asociado con la masa grasa y obesidad* | | | Chr:16q12.2 | | rs9939609  rs9930506  rs1421085 | | A:0.35  G:0.30  C:0.25 |
| *MC4R* | *receptor 4 Melanocortina* | | | Chr:18q22 | | rs17782313  rs8087522  rs11872992  rs8093815 | | C:0.22  A:0.32  A:0.14  A:0.28 |
| *MC3R* | *receptor 3 Melanocortina* | | | Chr:20q13.2-q13.3 | | rs6127698  rs6014648  rs2870730 | | G:0.44  T:0.30  C:0.28 |
| *PTER (180kb)* | *Relacionado con la Fosfotriesterasa* | | | Chr:10p12 | | rs7092037  rs7915486  rs2000202  rs1411876 | | C:0.30  G:0.45  T:0.49  C:0.32 |
|  |  | | |  | |  | |  |
|  | |  |  | |  | |  | |
|  | |  |  | |  | |  | |
|  | |  |  | |  | |  | |
|  | |  |  | |  | |  | |
|  | |  |  | |  | |  | |
|  | |  |  | |  | |  | |

| *NPC1* | *Enf Niemann-Pick , tipo C1* | Chr:18q11.2 | rs1805081 | C:0.24 |
| --- | --- | --- | --- | --- |
| *MAF (48kb)* | *Homólogo del oncogén del fibrosarcoma musculoaponeurótico v-maf* | Chr:16q22-q23 | rs1424233  rs2287974 | C:0.40  C:0.34 |
| *SH2B1* | *proteína adaptadora SH2B 1* | Chr:16p11.2 | rs7498665  rs7198606 | G:0.26  G:0.26 |
| *MTCH2* | *Portador mitocondrial 2* | Chr:11p11.2 | rs10838738 | G:0.28 |
| *GNPDA2 (600kb)* | *Glucosamina-6-fosfato deaminasa 2* | Chr:4p12 | rs10938397  rs2709  rs10020551 | G:0.34  T:0.20  G:0.47 |
| *POMC* | *Proopiomelanocortina* | Chr:2p23.3 | rs713586  rs6713532  rs6545975  rs934778 | C:0.44  C:0.45  C:0.28  G:0.19 |
| *PPARG* | *Receptor gamma activado por el factor proliferador de peroxisomas* | Chr:3p25 | rs10510418  rs4135247  rs709150  rs709156 | C:0.22  G:0.41  C:0.42  A:0.20 |

Abreviaturas: **IMC**: Índice de masa corporal. **GWAS**: Estudios de asociación del genoma completo1-8; **MAF**: Frecuencia del alelo menor; **SNP**: Polimorfismo nucleótido simple.

*Frecuencia del alelo menor según los datos procedentes de la fase de datos pública de la población caucasiana (1000 genomas).

**Referencias de la Tabla Complementaria**

1. Balt SL, Galloway GP, Baggott MJ, Schwartz Z, Mendelson J. Mechanisms and genetics of antipsychotic-associated weight gain. Clin Pharmacol Ther. 2011;90(1):179-83.

2. Lencz T, Malhotra AK. Pharmacogenetics of antipsychotic-induced side effects. Dialogues Clin Neurosci. 2009;11(4):405-15.

3. Lett TA, Wallace TJ, Chowdhury NI, Tiwari AK, Kennedy JL, Muller DJ. Pharmacogenetics of antipsychotic-induced weight gain: review and clinical implications. Mol Psychiatry. 2012;17(3):242-66.

4. Meyre D, Delplanque J, Chevre JC, Lecoeur C, Lobbens S, Gallina S, et al. Genome-wide association study for early-onset and morbid adult obesity identifies three new risk loci in European populations. Nat Genet. 2009;41(2):157-9.

5. Risselada AJ, Mulder H, Heerdink ER, Egberts TC. Pharmacogenetic testing to predict antipsychotic-induced weight gain: a systematic review. Pharmacogenomics. 2011;12(8):1213-27.

6. Speliotes EK, Willer CJ, Berndt SI, Monda KL, Thorleifsson G, Jackson AU, et al. Association analyses of 249,796 individuals reveal 18 new loci associated with body mass index. Nat Genet. 2010;42(11):937-48.

7. Thorleifsson G, Walters GB, Gudbjartsson DF, Steinthorsdottir V, Sulem P, Helgadottir A, et al. Genome-wide association yields new sequence variants at seven loci that associate with measures of obesity. Nat Genet. 2009;41(1):18-24.

8. Willer CJ, Speliotes EK, Loos RJ, Li S, Lindgren CM, Heid IM, et al. Six new loci associated with body mass index highlight a neuronal influence on body weight regulation. Nat Genet. 2009;41(1):25-34.
